# Supplementary material for: Activating mutations in CTNNB1 in aldosterone producing adenomas
Source: PubMed Central journal article supplement (PMC4728393; doi:10.1038/srep19546), 2016-01-27
Supplement: srep19546-s1.pdf [file srep19546-s1.pdf]

## **Activating mutations in *CTNNB1* in aldosterone producing adenomas**

Tobias Åkerström<sup>1</sup>, Rajani Maharjan<sup>1</sup>, Holger Sven Willenberg<sup>2</sup>, Kenko Cupisti<sup>3</sup>, Julian Ip<sup>4</sup>, Ana Moser<sup>5</sup>, Peter Stålberg<sup>1</sup>, Bruce Robinson<sup>4</sup>, K. Alexander Iwen<sup>5</sup>, Henning Dralle<sup>6</sup>, Martin K. Walz<sup>7</sup>, Hendrik Lehnert<sup>5</sup>, Stan Sidhu<sup>4</sup>, Celso Gomez-Sanchez<sup>8</sup>, Per Hellman<sup>1</sup>, and Peyman Björklund<sup>1\*</sup>.

<sup>1</sup>Department of Surgical Sciences, Uppsala University, Uppsala, Sweden.

<sup>2</sup>Department of Endocrinology and Metabolism, Rostock University Medical Center, Germany.

<sup>3</sup>General, Visceral and Pediatric Surgery University Hospital Düsseldorf, Düsseldorf, Germany.

<sup>4</sup>University of Sydney, Endocrine Surgical Unit and Cancer Genetics, Hormones and Cancer Group , Kolling Institute of Medical Research, Royal North Shore Hospital, Sydney, Australia .

<sup>5</sup>Department of Medicine I, University of Lübeck, University Hospital Schleswig-Holstein, Lübeck, Germany

<sup>6</sup>Department of General, Visceral and Vascular Surgery, University Hospital, University of Halle-Wittenberg, Halle/Saale, Germany. Sweden.

<sup>7</sup>Klinik für Chirurgie und Zentrum für Minimal Invasive Chirurgie, Kliniken Essen-Mitte, Essen, Germany.

<sup>8</sup>Endocrine Section, Department of Medicine, G.V. (Sonny) Montgomery VA Medical Center and University of Mississippi Medical Center, Jackson, USA.

\*Corresponding author: Peyman Björklund, Experimental Surgery Group, Uppsala University, Akademiska sjukhuset, ing 70 FOA2, 75185 Uppsala, Sweden. Phone: +46186114911 Fax: +46186114911 Email: peyman.bjorklund@surgsci.uu.se

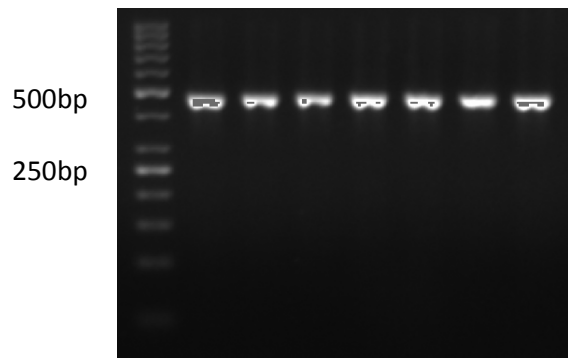

**Supplementary Fig. S1. Investigation of large exon 3 *CTNNB1* deletions.**

RT-PCR on cDNA from non-mutated APA samples using mRNA specific primers. Expected size of amplicon 464bp.

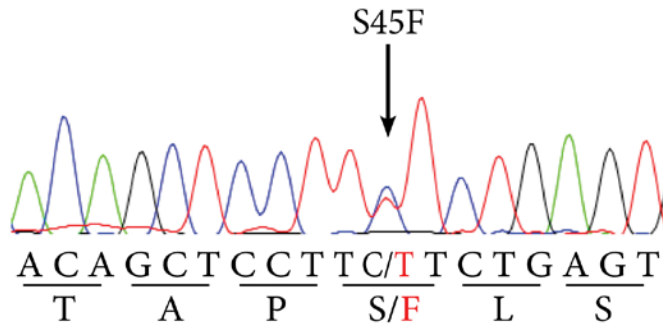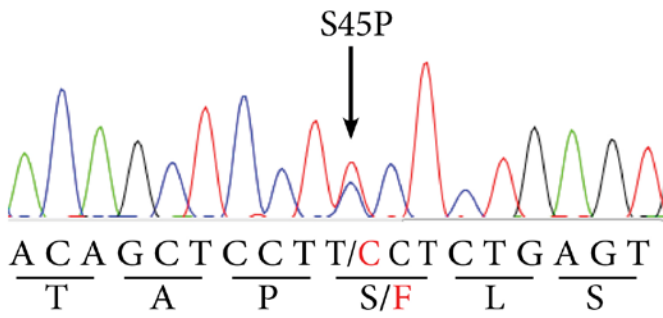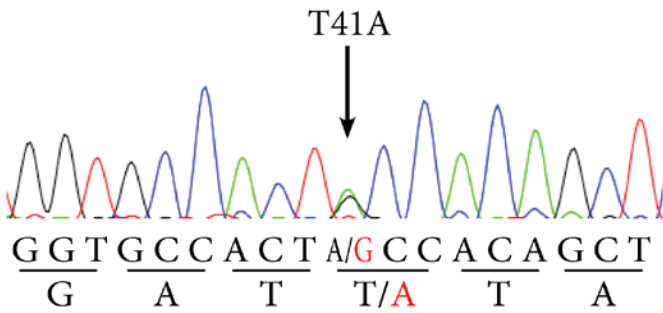

**Supplementary Figure S2. Observed missense mutations in *CTNNB1*.**

Chromatograms showing the different somatic *CTNNB1* mutations in APAs.

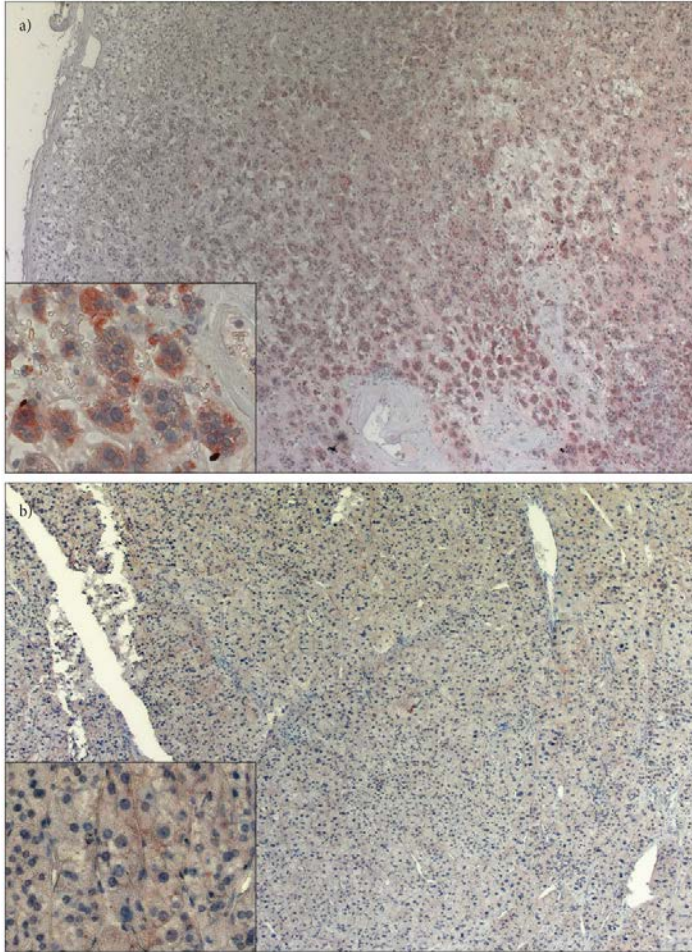

**Supplementary Fig. S3. Immunohistochemical analysis of  $\beta$ -catenin.**

APA with a *KCNJ5* mutation showing an area of ZG-like cells with strong cytoplasmic staining (a). APA with a *KCNJ5* mutation with mostly ZF-like cells and membranous expression (b).

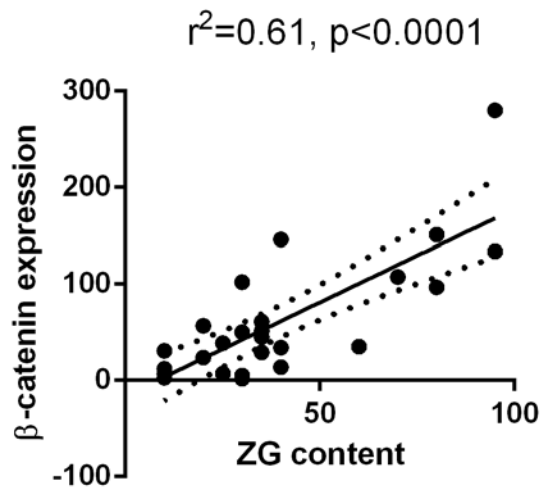

**Supplementary Fig. S4.  $\beta$ -catenin expression and ZG-like cell content.**

Correlation of ZG-like cell content and  $\beta$ -catenin expression. ZG=Zona Glomerulosa

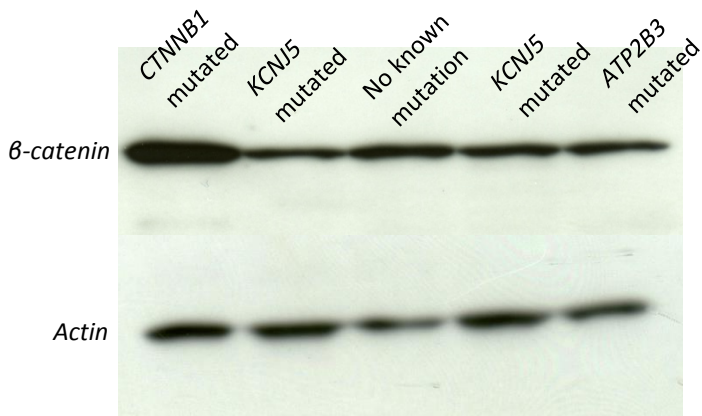

**Supplementary Figure S5. Western blot analysis of antibody used for immunohistochemistry.**

Western blot using a goat polyclonal anti  $\beta$ -catenin in one tumor with *CTNNB1* mutation (p.Ser45Pro) and four without *CTNNB1* mutation. Anti-actin as loading control.

| <b>Cohort</b>    | <b>No. of APAs</b> | <b><i>CTNNB1</i></b> |
|------------------|--------------------|----------------------|
| <b>Sweden</b>    | 41                 | 3 (7.3%)             |
| <b>Germany</b>   | 123                | 5 (4.1%)             |
| <b>Australia</b> | 34                 | 2 (5.9%)             |
| <b>Total:</b>    | <b>198</b>         | <b>10 (5.1%)</b>     |

**Supplementary Table S1. *CTNNB1* mutations found in different cohorts.**

|                                   |     | T41 |   |   |   |   |   |   |   |   |   | S45 |   |   |   |   |   |   |   |   |   |   |   |   |   |   |   |   |   |   |   |     |
|-----------------------------------|-----|-----|---|---|---|---|---|---|---|---|---|-----|---|---|---|---|---|---|---|---|---|---|---|---|---|---|---|---|---|---|---|-----|
| NP_001091679.1<br>(H. Sapiens)    | 26- | Q   | Q | S | Y | L | - | D | S | G | I | H   | S | G | A | T | T | T | A | P | S | L | S | G | K | G | N | P | E | E | E | -55 |
| XP_001138023.1<br>(P.Troglodytes) | 26- | Q   | Q | S | Y | L | - | D | S | G | I | H   | S | G | A | T | T | T | A | P | S | L | S | G | K | G | N | P | E | E | E | -55 |
| NP_001131124.1<br>(C. Lupus)      | 26- | Q   | Q | S | Y | L | - | D | S | G | I | H   | S | G | A | T | T | T | A | P | S | L | S | G | K | G | N | P | E | E | E | -55 |
| NP_445809.2<br>(R. Norvegicus)    | 26- | Q   | Q | S | Y | L | - | D | S | G | I | H   | S | G | A | T | T | T | A | P | S | L | S | G | K | G | N | P | E | E | E | -55 |
| NP_001159374.1<br>(M. Musculus)   | 26- | Q   | Q | S | Y | L | - | D | S | G | I | H   | S | G | A | T | T | T | A | P | S | L | S | G | K | G | N | P | E | E | E | -55 |
| NP_001069609.1<br>(B. Taurus)     | 26- | Q   | Q | S | Y | L | - | D | S | G | I | H   | S | G | A | T | T | T | A | P | S | L | S | G | K | G | N | P | E | E | E | -55 |
| NP_990412.1<br>(G. Gallus)        | 26- | Q   | Q | S | Y | L | - | D | S | G | I | H   | S | G | A | T | T | T | A | P | S | L | S | G | K | G | N | P | E | E | E | -55 |
| NP_571134.2<br>(D.Rerio)          | 26- | Q   | Q | S | Y | L | - | D | S | G | I | H   | S | G | A | T | T | T | A | P | S | L | S | G | K | G | N | P | E | D | D | -55 |
| XP_309245.4<br>(A. Gambiae)       | 36- | Q   | N | S | Y | L | G | D | S | G | I | H   | S | G | A | V | T | Q | V | P | S | L | S | G | K | - | - | - | D | D | D | -62 |
| NP_996328.1<br>(D. Melanogaster)  | 26- | Q   | N | S | Y | L | G | D | S | G | I | H   | S | G | A | V | T | Q | V | P | S | L | S | G | K | - | - | - | E | D | E | -52 |

**Supplementary Table S2. Conservation of the mutated amino acid residues in *CTNNB1*.**



| No. | <i>CTNNB1</i> mutation | β-catenin IHC            | CYP11B2 IHC (SCORE) | CYP11B1 IHC (SCORE) | Cell morphology | Gender 1=Male, 0=female | Age at op. | Adenoma size (mm) | Aldosterone pmol/L | Renin | Hypokalemia 1=yes, 0=no | Subtype classification | Postoperative outcome   |
|-----|------------------------|--------------------------|---------------------|---------------------|-----------------|-------------------------|------------|-------------------|--------------------|-------|-------------------------|------------------------|-------------------------|
| 1   | S45P                   | Cytoplasmic              | 375                 | 0.67                | ZF              | 0                       | 39         | 40                | 1168               | <1    | 1                       | CT                     | Normotensive, eukalemic |
| 2   | S45P                   | Cytoplasmic/nuclear      | 277                 | 0.22                | ZG/ZF           | 0                       | 51         | 13                | 790                | 7.0   | 1                       | AVS                    | na                      |
| 3   | S45P                   | Cytoplasmic              | 300                 | 101                 | ZF              | 0                       | 51         | 23                | 1567               | 1.0   | 1                       | na                     | na                      |
| 4   | S45F                   | Cytoplasmic/heterogenous | 28.7                | 291                 | ZF>ZG           | 0                       | 26         | 39                | 477                | 2.3   | 1                       | na                     | na                      |
| 5   | T41A                   | na                       | na                  | na                  | na              | 1                       | 35         | 25                | 2441               | 4.0   | na                      | CT                     | na                      |
| 6   | S45P                   | na                       | na                  | na                  | na              | 1                       | 66         | 45                | na                 | na    | na                      | MRI                    | na                      |
| 7   | S45P                   | Cytoplasmic/nuclear      | 30.0                | 213                 | ZG>ZF           | 1                       | 30         | 10                | 2011               | 1.5   | 1                       | CT/AVS                 | Normotensive, eukalemic |
| 8   | S45P                   | Membranous/nuclear       | 18.3                | 202                 | ZG/ZF           | 1                       | 34         | 20                | 2808               | 2.1   | 1                       | CT/AVS                 | Normotensive, eukalemic |
| 9   | S45P                   | Cytoplasmic/heterogenous | 0.97                | 326                 | ZF>ZG           | 0                       | 76         | 30                | 2300               | 1.6   | 1                       | CT/AVS                 | Normotensive, eukalemic |
| 10  | S45P                   | Cytoplasmic/nuclear      | 244                 | 0.58                | ZG>ZF           | 0                       | 32         | 15                | 2520               | <1    | 1                       | CT/AVS                 | Normotensive, eukalemic |

**Supplementary Table S3. Characteristics of patients with *CTNNB1* mutated tumors.**

Tumor size was measured either at surgery or by the pathologist. Workup describes the lateralization diagnostics made before surgery. \*Plasma renin concentration measured in mU/L. Numbers in parenthesis shows postoperative values.

CYP11B2 are graded from 0-400 using a modified H-score. ARR= Aldosterone to renin ratio, AVS=Adrenal vein sampling, CT=Computer tomography. na=not available. ZG=Zona Glomerulosa. ZF=Zona Fasciculata.

| Patient no. | Mutation      | H-SCORE | ZF % | ZG % |
|-------------|---------------|---------|------|------|
| 1           | Non-mutated   | 61,11   | 65   | 35   |
| 2           | <i>KCNJ5</i>  | 23,96   | 80   | 20   |
| 3           | <i>KCNJ5</i>  | 13,75   | 60   | 40   |
| 4           | Non-mutated   | 51,39   | 65   | 35   |
| 5           | <i>KCNJ5</i>  | 50,00   | 70   | 30   |
| 6           | Non-mutated   | 35,00   | 40   | 60   |
| 7           | <i>KCNJ5</i>  | 107,43  | 30   | 70   |
| 8           | <i>KCNJ5</i>  | 4,38    | 90   | 10   |
| 9           | Non-mutated   | 29,03   | 65   | 35   |
| 10          | <i>KCNJ5</i>  | 2,67    | 90   | 10   |
| 11          | Non-mutated   | 45,00   | 65   | 35   |
| 12          | Non-mutated   | 12,00   | 90   | 10   |
| 13          | <i>KCNJ5</i>  | 1,94    | 70   | 30   |
| 14          | Non-mutated   | 30,69   | 90   | 10   |
| 15          | Non-mutated   | 56,88   | 80   | 20   |
| 16          | Non-mutated   | 280,00  | 5    | 95   |
| 17          | Non-mutated   | 7,08    | 75   | 25   |
| 18          | Non-mutated   | 96,67   | 20   | 80   |
| 19          | Non-mutated   | 133,68  | 5    | 95   |
| 20          | <i>CTNNB1</i> | 38,96   | 75   | 25   |
| 21          | <i>KCNJ5</i>  | 34,31   | 60   | 40   |
| 22          | <i>KCNJ5</i>  | 6,67    | 90   | 10   |
| 23          | <i>KCNJ5</i>  | 102,22  | 70   | 30   |
| 24          | <i>KCNJ5</i>  | 5,15    | 70   | 30   |
| 25          | <i>CTNNB1</i> | 151,04  | 20   | 80   |
| 26          | <i>KCNJ5</i>  | 146,25  | 60   | 40   |

**Supplementary Table S4. Immunohistochemical analysis of  $\beta$ -catenin in APAs.**

Scoring of expression and amount of ZF-, and ZG like cells. ZF=Zona Fasciculata, ZG=Zona Glomerulosa

|                             | (A)<br>WT<br>(n=84) | (B)<br><i>KCNJ5</i><br>(n=92) | (C)<br><i>CTNNB1</i><br>(n=10) | Between groups<br>comparison (A-C)<br>(P) | A vs C<br>(P) | B vs C<br>(P) |
|-----------------------------|---------------------|-------------------------------|--------------------------------|-------------------------------------------|---------------|---------------|
| <b>Age at operation</b>     | 53.5 (±7.8)         | 45.6 (±11.0)                  | 37.0 (26-76)                   | 0.000018                                  | ns            | ns            |
| <b>Gender, Female in %</b>  | 40                  | 83                            | 60                             | 4.4e <sup>-8</sup>                        | ns*           | ns*           |
| <b>Tumor size (mm)</b>      | 14.7 (±7.9)         | 18.4 (±6.8)                   | 24 (10-45)                     | 0.000024                                  | 0.01          | ns            |
| <b>Aldosterone (pmol/L)</b> | 1137 (±789)         | 1377 (±1694)                  | 1567 (477-2520)                | ns                                        | ns            | ns            |

**Supplementary Table S5. Clinical data analysis.**

Values are presented as mean ±SD for parametric data, and median and range for non-parametric data. Statistical analysis was performed by between groups tests (A, B, C) using a Kruskal-Wallis test. Post hoc comparison (A vs C and B vs C) using a multiple comparison corrected Mann-Whitney U-test with  $p < 0.05/4$  as cutoff point. \*Chi squared test. WT= No mutation in *KCNJ5*, *ATP1A1*, *ATP2B3*, *CACNA1D* or *CTNNB1*.
